# Supplementary material for: Low bone mineral density due to secondary hyperparathyroidism in the GlatmTg(CAG‐A4GALT) mouse model of Fabry disease
Source: PubMed Central journal article supplement (PMC7325589; doi:10.1096/fba.2019-00080), 2020-06-10

# Supplemental Figure 1

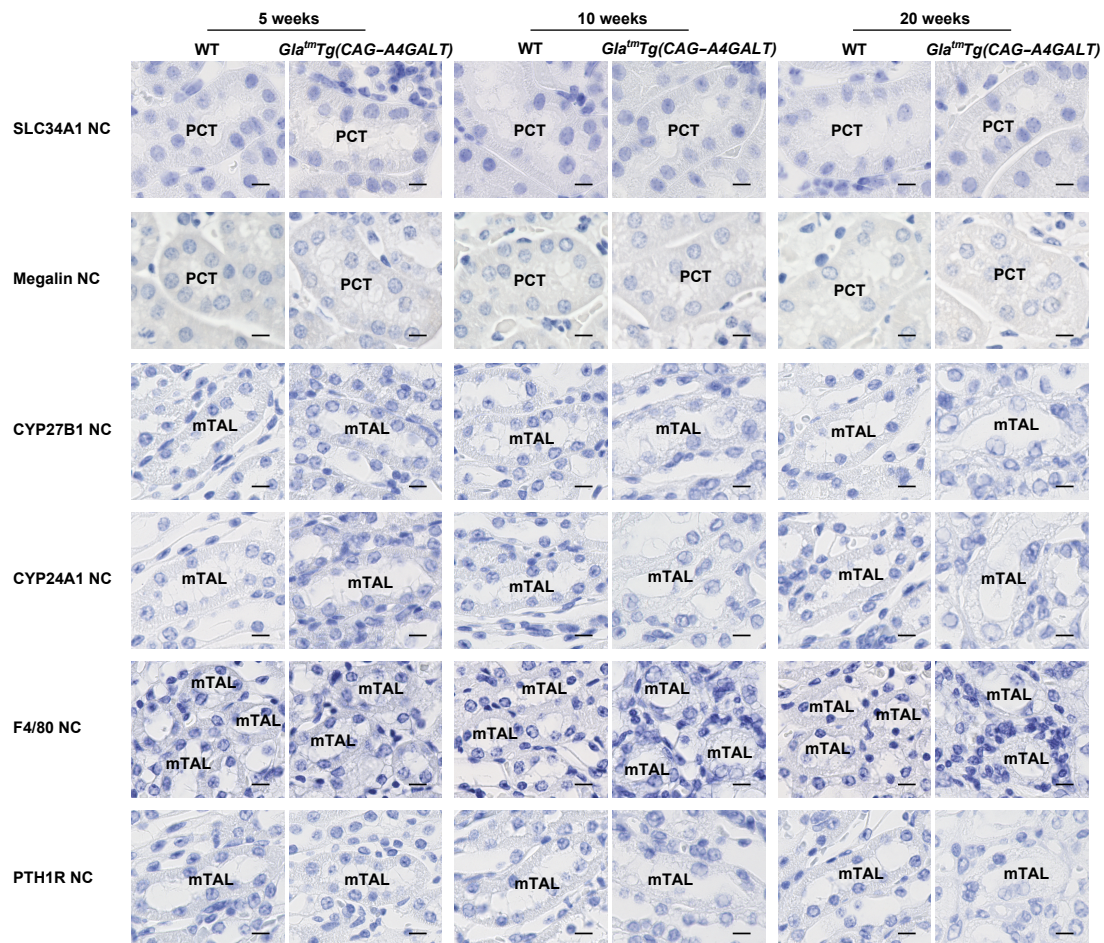

## Supplemental Figure 2

(A)

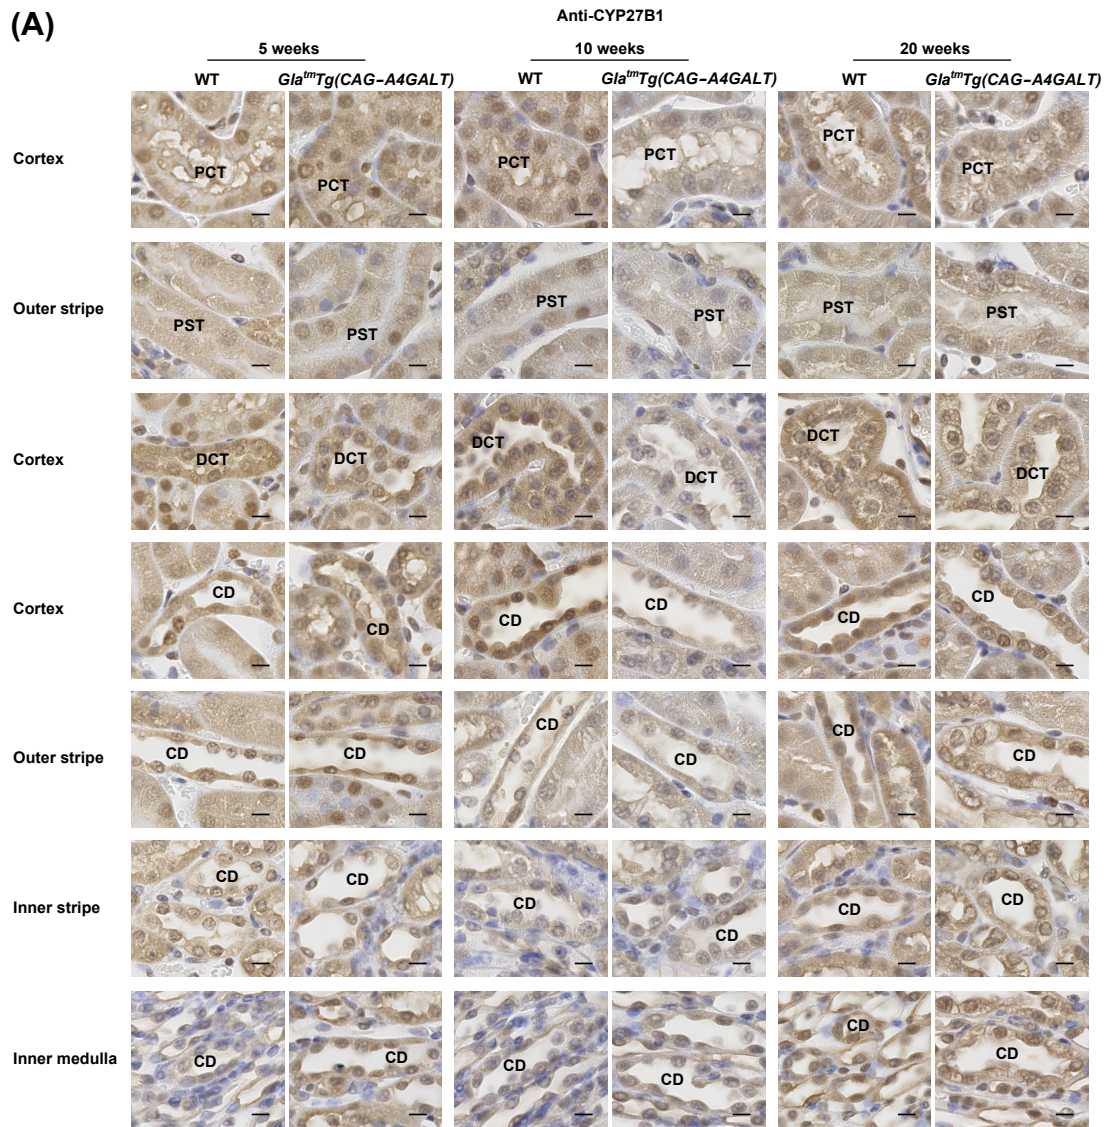

(B)

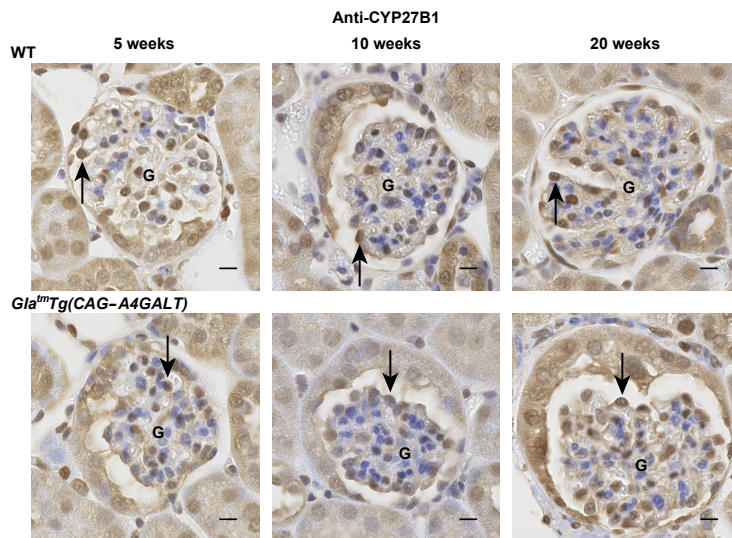

Supplemental Figure 3

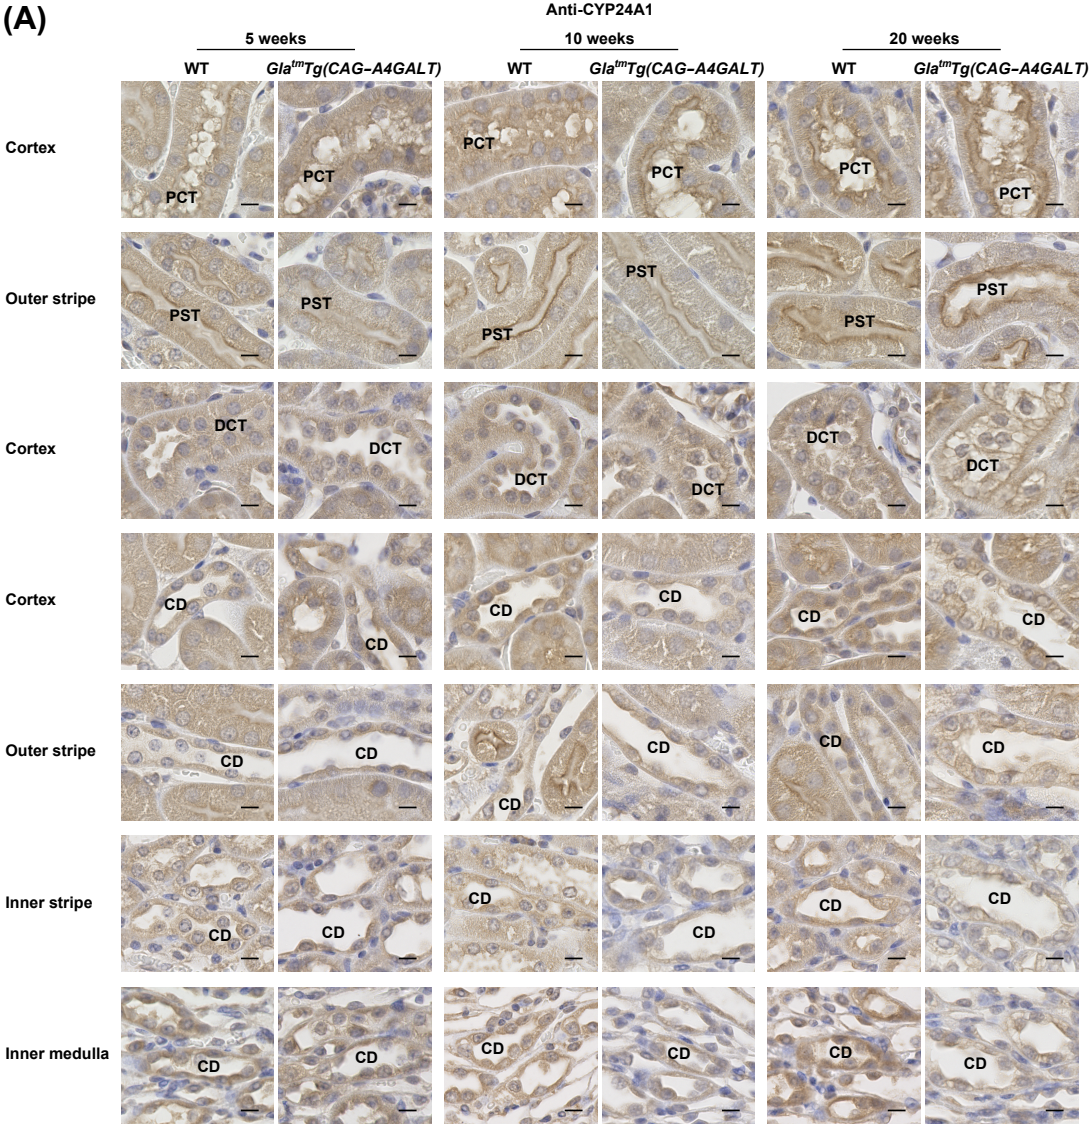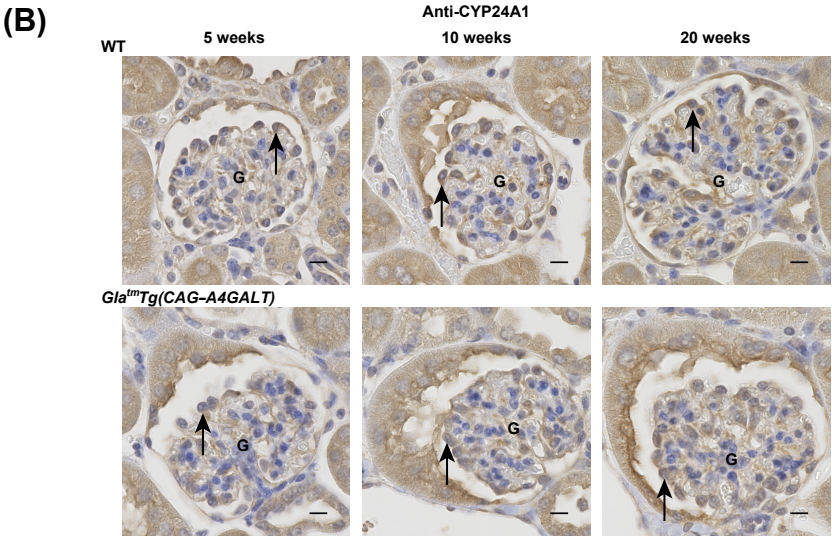

Supplement: FBA2-2-365-s001.pdf [file FBA2-2-365-s001.pdf]
